# Supplementary material for: A Metabolomic Study of the Analgesic Effect of Lappaconitine Hydrobromide (LAH) on Inflammatory Pain
Source: MDPI journal article supplement (doi:10.3390/metabo12100923), 2022-09-29
Supplement: s1 [file s1]

**Supplementary Information**

**A Metabolomic Study of the Analgesic Effect of Lappaconitine Hydrobromide (LAH) On inflammatory Pain**

Xu Li<sup>a,b,c</sup> , Xueqi Wang<sup>a</sup>, Zhengdou Li<sup>a</sup>, Ying Mao<sup>a</sup>, Zhao Liu<sup>d</sup>, Xiaoxiao Liua,<sup>e</sup>,  
Xinliang Zhu<sup>a,b,c,\*</sup>, Ji Zhang<sup>a,b,c,\*</sup>

<sup>a</sup> College of Life Science, Northwest Normal University, Lanzhou 730070, China

<sup>b</sup> Institute of New Rural Development, Northwest Normal University, Lanzhou 730070, China

<sup>c</sup> Bioactive Products Engineering Research Center for Gansu Distinctive Plants, Lanzhou 730070, China

<sup>d</sup> Department of Orthopaedic Surgery, Orthopaedic Institute, The First Affiliated Hospital, Soochow University, Suzhou 215006, Jiangsu Province, China

<sup>e</sup> Lanzhou Institute of Food and Drug Control, Lanzhou 740050, China

“\*” Corresponding author

\*Correspondence to be addressed to:

Xinliang Zhu: [xzhuaf@nwnu.edu.cn](mailto:xzhuaf@nwnu.edu.cn)

Ji Zhang: [zhangj@nwnu.edu.cn](mailto:zhangj@nwnu.edu.cn)

- Table 1.** Up-regulated differential metabolites (CFA+saline VS saline)  
**Table 2.** Down-regulated differential metabolites (CFA+saline VS saline)  
**Table 3.** Up-regulated differential metabolites (CFA+4mg/kg LAH VS CFA+saline)  
**Table 4.** Down-regulated differential metabolites CFA+4mg/kg LAH VS CFA+saline)  
**Table 5.** Up-regulated differential metabolites (CFA +8mg/kg LAH VS CFA+saline)  
**Table 6.** Down-regulated differential metabolites (CFA+8mg/kg LAH VS CFA+saline)  
**Table 7.** Up- regulated metabolic pathways (CFA+saline VS saline)  
**Table 8.** Down- regulated metabolic pathways (CFA+saline VS saline)  
**Table 9.** Up- regulated metabolic pathways (CFA+4mg/kg LAH VS CFA+saline)  
**Table 10.** Down- regulated metabolic pathways (CFA+4mg/kg LAH VS CFA+saline)  
**Table 11.** Up- regulated metabolic pathways (CFA +8mg/kg LAH VS CFA+saline)  
**Table 12.** Down- regulated metabolic pathways (CFA +8mg/kg LAH VS CFA+saline)

**Table S1.** Up-regulated differential metabolites (CFA+saline VS saline)

| m.z      | FC     | log2(FC) | raw. pval | VIP      | Compound                                             | Formula        | HMDBID      |
|----------|--------|----------|-----------|----------|------------------------------------------------------|----------------|-------------|
| 816.5781 | 19.247 | 4.2666   | 0.032081  | 1.948541 | PS (14:0/24:1(15Z))                                  | C44H84NO10P;   | HMDB0112307 |
| 818.5905 | 18.994 | 4.2475   | 0.019786  | 2.178607 | PS (18:0/20:0)                                       | C44H86NO10P;   | HMDB0010164 |
| 367.1015 | 6.2812 | 2.6511   | 0.010204  | 2.072798 | 3-Feruloylquinic acid                                | C17H20O9;      | HMDB0030669 |
| 212.0741 | 4.9261 | 2.3005   | 0.036462  | 1.753544 | 2-(4-Methyl-5-thiazolyl)ethyl butanoate              | C10H15NO2S;    | HMDB0032418 |
| 407.2792 | 4.4665 | 2.1591   | 0.000146  | 1.224039 | 3alpha,7alpha,12beta-Trihydroxy-5beta-cholanoic acid | C24H40O5;      | HMDB0000312 |
| 310.1777 | 3.3937 | 1.7628   | 0.002609  | 2.446785 | Lysyltyrosine                                        | C15H23N3O4;    | HMDB0028963 |
| 242.1759 | 3.2313 | 1.6921   | 0.019397  | 1.979134 | N-Undecanoylglycine                                  | C13H25NO3;     | HMDB0013286 |
| 192.0167 | 2.9029 | 1.5375   | 0.005277  | 1.795592 | Phosphocreatinine                                    | C4H8N3O4P;     | HMDB0041624 |
| 226.0345 | 2.7935 | 1.4821   | 0.017675  | 1.524057 | 5-(2'-Carboxyethyl)-4,6-Dihydroxypicolinate          | C9H9NO6;       | HMDB0006794 |
| 336.1291 | 2.7309 | 1.4494   | 0.025126  | 1.251445 | 4-O-alpha-D-Galactopyranosylcalystegine B2           | C13H23NO9;     | HMDB0038228 |
| 181.9905 | 2.5063 | 1.3255   | 0.048707  | 1.854902 | Saccharin                                            | C7H5NO3S;      | HMDB0029723 |
| 216.1232 | 2.4684 | 1.3036   | 0.004883  | 1.175059 | Propionylcarnitine                                   | C10H19NO4;     | HMDB0000824 |
| 294.1829 | 2.2953 | 1.1987   | 0.01333   | 2.408093 | Lysylphenylalanine                                   | C15H23N3O3;    | HMDB0028958 |
| 352.132  | 2.2358 | 1.1608   | 2.79E-06  | 2.319153 | Adinazolam                                           | C19H18ClN5;    | HMDB0014686 |
| 207.0137 | 2.0535 | 1.0381   | 0.046342  | 1.553307 | Garcinia acid                                        | C6H8O8;        | HMDB0031159 |
| 333.2447 | 9.4604 | 3.2419   | 0.036185  | 1.979704 | 16-a-Hydroxypregnenolone                             | C21H32O3;      | HMDB0000315 |
| 301.2147 | 6.009  | 2.5871   | 0.000105  | 1.514839 | all-trans-Retinoic acid                              | C20H28O2;      | HMDB0001852 |
| 508.0007 | 4.2454 | 2.0859   | 0.016462  | 2.127086 | Adenosine triphosphate                               | C10H16N5O13P3; | HMDB0000538 |
| 420.3082 | 4.1925 | 2.0678   | 0.002262  | 2.45446  | Stearidonyl carnitine                                | C25H41NO4;     | HMDB0006463 |
| 170.0593 | 3.9702 | 1.9892   | 0.013284  | 1.67924  | L-Isoleucine                                         | C6H13NO2;      | HMDB0000172 |
| 760.5817 | 3.9234 | 1.9721   | 0.026488  | 2.476718 | PC (14:0/20:1(11Z))                                  | C42H82NO8P;    | HMDB0007879 |
| 138.0658 | 3.5914 | 1.8445   | 0.004168  | 1.660407 | Isoniazid                                            | C6H7N3O;       | HMDB0015086 |
| 258.1087 | 2.4977 | 1.3206   | 0.036986  | 1.712688 | 5-Methylcytidine                                     | C10H15N3O5;    | HMDB0000982 |
| 338.3398 | 2.4043 | 1.2656   | 0.044635  | 1.687575 | Arachidyl alcohol                                    | C20H42O;       | HMDB0011619 |
| 159.0911 | 2.2995 | 1.2013   | 0.013214  | 2.168322 | L-Tryptophan                                         | C11H12N2O2;    | HMDB0000929 |
| 118.086  | 2.1257 | 1.0879   | 0.049708  | 1.857006 | L-Valine                                             | C5H11NO2;      | HMDB0000883 |
| 126.0659 | 2.1058 | 1.0744   | 0.043581  | 1.467167 | 5-Methylcytidine                                     | C10H15N3O5;    | HMDB0000982 |
| 276.1255 | 2.0624 | 1.0443   | 0.008324  | 2.042136 | (±)-Ribaline                                         | C15H17NO4;     | HMDB0033345 |

**Table S2.** Down-regulated differential metabolites (CFA+saline VS saline)

| m.z      | FC       | log2(FC) | raw. pval | VIP      | Compound                                                                            | Formula         | HMDBID      |
|----------|----------|----------|-----------|----------|-------------------------------------------------------------------------------------|-----------------|-------------|
| 143.0391 | 0.45822  | -1.1259  | 0.04157   | 1.952116 | 2-Propionyl-2-thiazoline                                                            | C6H9NOS;        | HMDB0032493 |
| 286.164  | 0.4498   | -1.1526  | 0.012345  | 1.938468 | N-Monodesmethyl-rizatriptan                                                         | C15H19N5O;      | HMDB0060847 |
| 167.0698 | 0.43542  | -1.1995  | 0.012549  | 2.068671 | 3-(3-Hydroxyphenyl) propanoic acid                                                  | C9H10O3;        | HMDB0000375 |
| 454.1693 | 0.42732  | -1.2266  | 0.022614  | 1.381900 | O-Methyl-4-[(2',3',4'-tri-O-acetyl-alpha-L-rhamnosyloxy) benzyl]carbamate           | C21H27NO10;     | HMDB0031948 |
| 261.1089 | 0.36493  | -1.4543  | 0.042592  | 1.639336 | Glutamylhydroxyproline                                                              | C10H16N2O6;     | HMDB0011161 |
| 175.1111 | 0.36226  | -1.4649  | 0.007902  | 2.193182 | 6-Phenyl-3-hexen-2-one                                                              | C12H14O;        | HMDB0031622 |
| 526.2909 | 0.32139  | -1.6376  | 0.029307  | 1.727389 | LysoPE (0:0/22:6(4Z,7Z,10Z,13Z,16Z,19Z))                                            | C27H44NO7P;     | HMDB0011496 |
| 317.0698 | 0.30847  | -1.6968  | 0.00612   | 2.437929 | 4'-Hydroxycyclobazam                                                                | C16H13ClN2O3;   | HMDB0060771 |
| 214.0153 | 0.2913   | -1.7794  | 0.028978  | 1.674660 | Carmustine                                                                          | C5H9Cl2N3O2;    | HMDB0014407 |
| 365.1340 | 0.27546  | -1.8601  | 0.008734  | 1.942993 | 2-(acetylamino)-1,5-anhydro-2-deoxy-3-O-b-D-galactopyranosyl-D-arabino-Hex-1-enitol | C14H23NO10;     | HMDB0002278 |
| 129.0197 | 0.2674   | -1.9029  | 0.015293  | 1.843744 | 5-Hydroxy-2-furoic acid                                                             | C5H4O4;         | HMDB0059784 |
| 178.1219 | 0.21008  | -2.251   | 0.011883  | 1.721154 | 2-Pentylfuran                                                                       | C9H14O;         | HMDB0013824 |
| 119.0853 | 0.06740  | -3.8909  | 0.002497  | 2.083025 | Longistylin C                                                                       | C20H22O;        | HMDB0038544 |
| 276.1432 | 0.05848  | -4.0958  | 5.96E-11  | 2.689502 | Glutarylcarntine                                                                    | C12H21NO6;      | HMDB0013130 |
| 407.1644 | 0.05801  | -4.1074  | 5.97E-05  | 2.458843 | 3-(3-hydroxyphenyl)-2-phenyl-4-[(E)-2-phenylethenyl]-2,3-dihydro-1-benzofuran-6-ol  | C28H22O3;       | HMDB0129161 |
| 343.0520 | 0.04345  | -4.5244  | 0.021633  | 1.631803 | N-Acetylaspartylglutamic acid                                                       | C11H16N2O8;     | HMDB0001067 |
| 323.0754 | 0.41036  | -1.285   | 0.033734  | 1.623938 | Mahaleboside                                                                        | C15H16O8;       | HMDB0032984 |
| 435.2515 | 0.37242  | -1.425   | 0.009463  | 1.867405 | LysoPA (0:0/18:1(9Z))                                                               | C21H41O7P;      | HMDB0007851 |
| 513.6644 | 0.37098  | -1.4306  | 0.046733  | 1.846804 | Linoleoyl-CoA                                                                       | C39H66N7O17P3S; | HMDB0001064 |
| 311.1683 | 0.28464  | -1.8128  | 0.008068  | 2.065756 | N-Undecylbenzenesulfonic acid                                                       | C17H28O3S;      | HMDB0032549 |
| 420.9711 | 0.24263  | -2.0432  | 0.010562  | 1.665603 | Chlorophenol red                                                                    | C19H12Cl2O5S;   | HMDB0036699 |
| 524.2998 | 0.23544  | -2.0865  | 0.019572  | 1.958424 | 1-Stearoylglycerophosphoserine                                                      | C24H48NO9P;     | HMDB0061698 |
| 886.5536 | 0.22221  | -2.17    | 0.031776  | 1.865563 | PI (16:0/22:4(10Z,13Z,16Z,19Z))                                                     | C47H83O13P;     | HMDB0009793 |
| 889.5796 | 0.14806  | -2.7557  | 0.008072  | 1.189033 | PI (16:0/22:3(10Z,13Z,16Z))                                                         | C47H85O13P;     | HMDB0009792 |
| 325.1841 | 0.081417 | -3.6185  | 0.00119   | 2.415962 | 2-Dodecylbenzenesulfonic acid                                                       | C18H30O3S;      | HMDB0031031 |

**Table S3.** Up-regulated differential metabolites (CFA + 4 mg/kg LAH VS CFA+saline)

| m.z      | FC     | log2(FC) | raw. pval | vip      | Compound                                                         | Formula     | HMDBID      |
|----------|--------|----------|-----------|----------|------------------------------------------------------------------|-------------|-------------|
| 343.0520 | 38.026 | 5.2489   | 0.008051  | 1.999891 | N-Acetylaspartylglutamic acid                                    | C11H16N2O8; | HMDB0001067 |
| 113.0344 | 10.81  | 3.4343   | 0.036502  | 1.57608  | Uracil                                                           | C4H4N2O2;   | HMDB0000300 |
| 342.2624 | 10.101 | 3.3364   | 0.005518  | 1.094027 | trans-2-Dodecenoylcarnitine                                      | C19H35NO4;  | HMDB0013326 |
| 311.2568 | 6.0639 | 2.6002   | 0.012234  | 1.046699 | (R)-2-Hydroxysterculic acid                                      | C19H34O3;   | HMDB0031060 |
| 167.0919 | 5.9836 | 2.581    | 0.002561  | 1.841763 | 1-Deoxy-D-glucitol                                               | C6H14O5;    | HMDB0041500 |
| 149.0818 | 5.5323 | 2.4679   | 0.010205  | 1.864692 | Mevalonic acid                                                   | C6H12O4;    | HMDB0000227 |
| 175.1111 | 4.478  | 2.1629   | 0.000704  | 2.33527  | 6-Phenyl-3-hexen-2-one                                           | C12H14O;    | HMDB0031622 |
| 218.1379 | 4.1485 | 2.0526   | 2.79E-05  | 2.315508 | Propionylcarnitine                                               | C10H19NO4;  | HMDB0000824 |
| 165.0763 | 4.0661 | 2.0236   | 0.01614   | 1.794793 | L-Fucose                                                         | C6H12O5;    | HMDB0000174 |
| 422.3241 | 3.9481 | 1.9811   | 0.013104  | 1.767094 | Gamma-linolenyl carnitine                                        | C25H43NO4;  | HMDB0006318 |
| 215.0694 | 3.8021 | 1.9268   | 0.027243  | 1.611336 | Phenyl salicylate                                                | C13H10O3;   | HMDB0032018 |
| 288.1975 | 3.4547 | 1.7886   | 0.002154  | 1.880929 | N-[2-(4-Prenyloxyphenyl)ethyl]tiglamide                          | C18H25NO2;  | HMDB0041142 |
| 276.1950 | 3.2512 | 1.701    | 0.00489   | 1.462375 | Citronellyl anthranilate                                         | C17H25NO2;  | HMDB0032208 |
| 135.0660 | 3.0067 | 1.5882   | 0.046777  | 1.192951 | 2,3-Dihydroxyvaleric acid                                        | C5H10O4;    | HMDB0000421 |
| 111.0441 | 2.6123 | 1.3853   | 0.000961  | 2.24718  | Pyrocatechol                                                     | C6H6O2;     | HMDB0000957 |
| 281.0497 | 2.596  | 1.3763   | 0.006069  | 1.468420 | 6-[(2-carboxyacetyl)oxy]-3,4,5-trihydroxyoxane-2-carboxylic acid | C9H12O10;   | HMDB0127482 |
| 283.0464 | 2.5863 | 1.3709   | 0.012716  | 1.613437 | Bikojic acid                                                     | C12H10O8;   | HMDB0034034 |
| 118.0861 | 2.5266 | 1.3372   | 0.023214  | 1.604875 | L-Valine                                                         | C5H11NO2;   | HMDB0000883 |
| 143.0391 | 2.5187 | 1.3327   | 0.014033  | 1.930327 | 2-Propionyl-2-thiazoline                                         | C6H9NOS;    | HMDB0032493 |
| 179.0920 | 2.401  | 1.2636   | 0.019626  | 1.335832 | Dibutyl disulfide                                                | C8H18S2;    | HMDB0029569 |
| 112.0505 | 2.2556 | 1.1735   | 0.025012  | 1.53286  | Cytosine                                                         | C4H5N3O;    | HMDB0000630 |
| 149.0817 | 2.1018 | 1.0716   | 0.046016  | 1.480737 | Mevalonic acid                                                   | C6H12O4;    | HMDB0000227 |
| 227.2011 | 45.255 | 5.5      | 0.045449  | 2.113848 | Myristic acid                                                    | C14H28O2;   | HMDB0000806 |
| 187.0060 | 4.1783 | 2.0629   | 0.046469  | 1.374291 | p-Cresol sulfate                                                 | C7H8O4S;    | HMDB0011635 |
| 126.0016 | 3.6637 | 1.8733   | 0.046044  | 1.941178 | 2-Acetylthiazole                                                 | C5H5NOS;    | HMDB0032964 |
| 311.1683 | 3.1723 | 1.6655   | 0.020282  | 2.455782 | N-Undecylbenzenesulfonic acid                                    | C17H28O3S;  | HMDB0032549 |
| 833.5196 | 3.1519 | 1.6562   | 0.005256  | 1.236311 | PI (16:0/18:2(9Z,12Z))                                           | C43H79O13P; | HMDB0009784 |
| 277.2172 | 2.706  | 1.4361   | 0.011989  | 2.517848 | alpha-Linolenic acid                                             | C18H30O2;   | HMDB0001388 |
| 913.5774 | 2.5808 | 1.3678   | 0.00342   | 1.457307 | PI (18:0/22:4(10Z,13Z,16Z,19Z))                                  | C49H87O13P; | HMDB0009817 |

**Table S4.** Down-regulated differential metabolites (CFA + 4 mg/kg LAH VS CFA+saline)

| m.z      | FC       | log2(FC) | raw.pval | vip      | Compound                                                                               | Formula      | HMDBID      |
|----------|----------|----------|----------|----------|----------------------------------------------------------------------------------------|--------------|-------------|
| 244.1531 | 0.42253  | -1.2429  | 0.005747 | 1.134147 | Tiglylcarnitine                                                                        | C12H21NO4;   | HMDB0002366 |
| 357.2772 | 0.39972  | -1.3229  | 0.046704 | 1.088948 | Tetracosahexanoic acid                                                                 | C24H36O2;    | HMDB0002007 |
| 302.1741 | 0.39359  | -1.3452  | 0.016739 | 1.116391 | Dobutamine                                                                             | C18H23NO3;   | HMDB0014979 |
| 407.1644 | 0.31026  | -1.6885  | 0.002642 | 2.048554 | 3-(3-hydroxyphenyl)-2-phenyl-4-[(E)-2-phenylethenyl]-<br>2,3-dihydro-1-benzofuran-6-ol | C28H22O3;    | HMDB0129161 |
| 242.1531 | 0.27707  | -1.8517  | 0.00011  | 2.545078 | 2-Carboxy-4-dodecanolide                                                               | C13H22O4;    | HMDB0030987 |
| 295.1717 | 0.23224  | -2.1063  | 0.030125 | 2.074916 | (E, E)-1,6-bis(4-methoxyphenyl)-1,5-hexadiene                                          | C20H22O2;    | HMDB0035443 |
| 198.0868 | 0.16581  | -2.5924  | 0.001023 | 2.036503 | N-Acetylhistidine                                                                      | C8H11N3O3;   | HMDB0032055 |
| 325.1222 | 0.16346  | -2.613   | 0.02373  | 1.555477 | Acetohexamide                                                                          | C15H20N2O4S; | HMDB0014558 |
| 301.2147 | 0.12171  | -3.0384  | 0.000942 | 1.543497 | all-trans-Retinoic acid                                                                | C20H28O2;    | HMDB0001852 |
| 276.1432 | 0.11464  | -3.1248  | 1.21E-05 | 2.410398 | Glutaryl carnitine                                                                     | C12H21NO6;   | HMDB0013130 |
| 241.1535 | 0.1054   | -3.2461  | 0.005473 | 1.998421 | Pirbuterol                                                                             | C12H20N2O3;  | HMDB0015407 |
| 182.1169 | 0.094529 | -3.4031  | 0.006765 | 2.235141 | beta-O-Methylnephrene                                                                  | C10H15NO2;   | HMDB0033868 |
| 334.3083 | 0.091549 | -3.4493  | 0.016727 | 1.885209 | 2,4,12-Octadecatrienoic acid isobutylamide                                             | C22H39NO;    | HMDB0032033 |
| 276.1255 | 0.088616 | -3.4963  | 0.02117  | 1.691246 | (±)-Ribaline                                                                           | C15H17NO4;   | HMDB0033345 |
| 133.1006 | 0.087262 | -3.5185  | 0.028946 | 1.574617 | p-Mentha-1,3,5,8-tetraene                                                              | C10H12;      | HMDB0029641 |
| 273.147  | 0.046742 | -4.4191  | 0.020392 | 2.18364  | (S)-Verimol F                                                                          | C17H20O3;    | HMDB0036558 |
| 162.0756 | 0.003337 | -8.2273  | 0.01967  | 1.757042 | L-Proline                                                                              | C5H9NO2;     | HMDB0000162 |
| 310.1777 | 0.47222  | -1.0825  | 0.046027 | 2.822441 | Lysyltyrosine                                                                          | C15H23N3O4;  | HMDB0028963 |
| 349.2383 | 0.4437   | -1.1723  | 0.001167 | 1.043016 | Tetrahydrocorticosterone                                                               | C21H34O4;    | HMDB0000268 |
| 612.1476 | 0.40157  | -1.3163  | 0.002397 | 2.472912 | Delphinidin 3-(3"-p-coumaroylglucoside)                                                | C30H27O14;   | HMDB0030099 |
| 242.1759 | 0.33315  | -1.5857  | 0.048106 | 2.237574 | N-Undecanoylglycine                                                                    | C13H25NO3;   | HMDB0013286 |
| 407.2792 | 0.20467  | -2.2886  | 4.78E-07 | 1.883707 | 3alpha,7alpha,12beta-Trihydroxy-5beta-cholanoic acid                                   | C24H40O5;    | HMDB0000312 |
| 225.0877 | 0.006665 | -7.2291  | 0.010084 | 2.365000 | Porphobilinogen                                                                        | C10H14N2O4;  | HMDB0000245 |

**Table S5.** Up-regulated differential metabolites (CFA + 8 mg/kg LAH VS CFA+saline)

| m.z      | FC     | log2(FC) | raw.pval | VIP      | Compound                                                                        | Formula     | HMDBID      |
|----------|--------|----------|----------|----------|---------------------------------------------------------------------------------|-------------|-------------|
| 342.2624 | 10.467 | 3.3878   | 0.015358 | 2.240215 | trans-2-Dodecenoylcarnitine                                                     | C19H35NO4;  | HMDB0013326 |
| 188.0698 | 5.141  | 2.362    | 0.016022 | 2.054379 | Indoleacrylic acid                                                              | C11H9NO2    | HMDB0000734 |
| 277.179  | 4.099  | 2.0353   | 0.000674 | 2.190074 | Cyclandelate                                                                    | C17H24O3;   | HMDB0015586 |
| 422.3241 | 3.9896 | 1.9962   | 0.007153 | 2.409213 | Gamma-linolenyl carnitine                                                       | C25H43NO4;  | HMDB0006318 |
| 149.0818 | 3.5442 | 1.8255   | 0.048059 | 1.860642 | Mevalonic acid                                                                  | C6H12O4;    | HMDB0000227 |
| 218.1379 | 2.5449 | 1.3476   | 0.030549 | 2.19103  | Propionylcarnitine                                                              | C10H19NO4;  | HMDB0000824 |
| 279.1768 | 2.4546 | 1.2955   | 0.004172 | 1.919588 | Longistylin C                                                                   | C20H22O;    | HMDB0038544 |
| 288.1975 | 2.4412 | 1.2876   | 6.95E-05 | 1.712916 | N-[2-(4-Prenyloxyphenyl)ethyl]tiglamide                                         | C18H25NO2;  | HMDB0041142 |
| 295.1717 | 2.4329 | 1.2827   | 0.001895 | 2.157766 | (E, E)-1,6-bis(4-methoxyphenyl)-1,5-hexadiene                                   | C20H22O2;   | HMDB0035443 |
| 369.2809 | 2.3578 | 1.2375   | 0.002386 | 2.165357 | (R)-3,4-Dihydro-2-(4,8,12-trimethyl-3,7,11-tridecatrienyl)-2H-1-benzopyran-6-ol | C25H36O2;   | HMDB0036013 |
| 241.2162 | 94.692 | 6.5652   | 0.030731 | 1.844465 | Pentadecanoic acid                                                              | C15H30O2;   | HMDB0000826 |
| 253.2169 | 45.488 | 5.5074   | 0.013399 | 2.237681 | Hypogeic acid                                                                   | C16H30O2;   | HMDB0002186 |
| 239.0772 | 26.814 | 4.7449   | 0.029605 | 1.894992 | D-glycero-L-galacto-Octulose                                                    | C8H16O8;    | HMDB0029954 |
| 889.5796 | 21.022 | 4.3938   | 0.00046  | 1.590157 | PI (16:0/22:3(10Z,13Z,16Z))                                                     | C47H85O13P; | HMDB0009792 |
| 325.1841 | 9.1557 | 3.1947   | 0.016962 | 2.205195 | 2-Dodecylbenzenesulfonic acid                                                   | C18H30O3S;  | HMDB0031031 |
| 524.2998 | 7.4001 | 2.8875   | 0.002134 | 1.410184 | 1-Stearoylglycerophosphoserine                                                  | C24H48NO9P; | HMDB0061698 |
| 888.5734 | 6.2957 | 2.6544   | 0.000165 | 1.820788 | PI (16:0/22:3(10Z,13Z,16Z))                                                     | C47H85O13P; | HMDB0009792 |
| 269.2483 | 5.7606 | 2.5262   | 0.000602 | 2.688105 | Heptadecanoic acid                                                              | C17H34O2;   | HMDB0002259 |
| 239.0719 | 4.8937 | 2.2909   | 0.018057 | 1.926519 | 2',5'-Dihydroxychalcone                                                         | C15H12O3;   | HMDB0032129 |
| 277.2172 | 4.4012 | 2.1379   | 0.02179  | 2.074078 | alpha-Linolenic acid                                                            | C18H30O2;   | HMDB0001388 |
| 863.5634 | 3.3454 | 1.7422   | 0.000794 | 1.499883 | PI (18:0/18:1(9Z))                                                              | C45H85O13P; | HMDB0240667 |
| 297.2428 | 2.0994 | 1.07     | 0.021124 | 1.637517 | 3-Oxooctadecanoic acid                                                          | C18H34O3;   | HMDB0010736 |

**Table S6.** Down-regulated differential metabolites (CFA + 8 mg/kg LAH VS CFA+saline)

| m.z      | FC       | log2(FC) | raw.pval | VIP      | Compound                                                                           | Formula        | HMDBID      |
|----------|----------|----------|----------|----------|------------------------------------------------------------------------------------|----------------|-------------|
| 310.1777 | 0.44383  | -1.1719  | 0.004815 | 2.512193 | Lysyltyrosine                                                                      | C15H23N3O4;    | HMDB0028963 |
| 166.9738 | 0.42296  | -1.2414  | 0.016765 | 1.644247 | Phosphoenolpyruvic acid                                                            | C3H5O6P;       | HMDB0000263 |
| 407.2792 | 0.41087  | -1.2832  | 0.003796 | 1.722873 | 3alpha,7alpha,12beta-Trihydroxy-5beta-cholanoic acid                               | C24H40O5;      | HMDB0000312 |
| 182.0458 | 0.33742  | -1.5674  | 0.008578 | 2.250291 | 4-Pyridoxic acid                                                                   | C8H9NO4;       | HMDB0000017 |
| 352.132  | 0.33282  | -1.5872  | 0.013361 | 2.127306 | Adinazolam                                                                         | C19H18ClN5;    | HMDB0014686 |
| 373.0981 | 0.25001  | -2       | 0.016015 | 2.0525   | Succinylaminoimidazole carboxamide riboside                                        | C13H18N4O9;    | HMDB0240295 |
| 335.2931 | 0.49848  | -1.0044  | 0.016054 | 1.447006 | Docosatrienoic acid                                                                | C22H38O2;      | HMDB0002823 |
| 338.3398 | 0.44543  | -1.1667  | 0.048262 | 1.690396 | Arachidyl alcohol                                                                  | C20H42O;       | HMDB0011619 |
| 302.1741 | 0.40592  | -1.3007  | 0.012193 | 2.225286 | Dobutamine                                                                         | C18H23NO3;     | HMDB0014979 |
| 355.2618 | 0.37155  | -1.4284  | 0.008778 | 2.004698 | 1,1'-[1,12-Dodecanediylbis(oxy)]bisbenzene                                         | C24H34O2;      | HMDB0039760 |
| 333.2447 | 0.32921  | -1.6029  | 0.003163 | 1.046064 | 16-a-Hydroxypregnenolone                                                           | C21H32O3;      | HMDB0000315 |
| 276.1432 | 0.32676  | -1.6137  | 0.008224 | 1.900745 | Glutarylcarntine                                                                   | C12H21NO6;     | HMDB0013130 |
| 407.1644 | 0.25316  | -1.9819  | 0.001313 | 2.143949 | 3-(3-hydroxyphenyl)-2-phenyl-4-[(E)-2-phenylethenyl]-2,3-dihydro-1-benzofuran-6-ol | C28H22O3;      | HMDB0129161 |
| 666.1289 | 0.22873  | -2.1283  | 0.009734 | 2.219455 | NADH                                                                               | C21H29N7O14P2; | HMDB0001487 |
| 276.1255 | 0.21511  | -2.2169  | 0.000349 | 2.271959 | (±)-Ribaline                                                                       | C15H17NO4;     | HMDB0033345 |
| 198.0868 | 0.20791  | -2.266   | 0.00213  | 1.883446 | N-Acetylhistidine                                                                  | C8H11N3O3;     | HMDB0032055 |
| 114.0911 | 0.18003  | -2.4737  | 0.005872 | 2.209449 | 2,5-Dihydro-2,4,5-trimethyloxazole                                                 | C6H11NO;       | HMDB0031199 |
| 301.2147 | 0.15967  | -2.6469  | 0.000454 | 2.359639 | all-trans-Retinoic acid                                                            | C20H28O2;      | HMDB0001852 |
| 425.3431 | 0.15493  | -2.6903  | 0.001518 | 1.108938 | alpha-Tocotrienol                                                                  | C29H44O2;      | HMDB0006327 |
| 182.1169 | 0.14407  | -2.7952  | 0.036291 | 2.380631 | beta-O-Methyllyneprhine                                                            | C10H15NO2;     | HMDB0033868 |
| 330.0712 | 0.12053  | -3.0526  | 0.000645 | 2.199608 | Glutathione                                                                        | C10H17N3O6S    | HMDB0000125 |
| 303.1357 | 0.095353 | -3.3906  | 0.018477 | 2.294517 | Arginylglutamine                                                                   | C11H22N6O4     | HMDB0028707 |
| 480.3069 | 0.055113 | -4.1815  | 0.031055 | 2.125346 | LysoPE(0:0/18:1(11Z))                                                              | C23H46NO7P;    | HMDB0011475 |
| 297.1878 | 0.022926 | -5.4469  | 1.62E-05 | 2.543366 | 17a-Ethynylestradiol                                                               | C20H24O2;      | HMDB0001926 |
| 273.147  | 0.010241 | -6.6095  | 0.011057 | 2.339072 | (S)-Verimol F                                                                      | C17H20O3;      | HMDB0036558 |

**Table S7.** Up- regulated metabolic pathways (CFA+saline VS saline)

| Pathway                                     | Total | Expected | Hits | Raw p    | #NAME?  | Holm adjust | FDR     | Impact  |
|---------------------------------------------|-------|----------|------|----------|---------|-------------|---------|---------|
| Valine, leucine and isoleucine biosynthesis | 8     | 0.074221 | 2    | 0.002169 | 2.6637  | 0.1822      | 0.1822  | 0       |
| Aminoacyl-tRNA biosynthesis                 | 48    | 0.44533  | 3    | 0.008596 | 2.0657  | 0.71345     | 0.36102 | 0       |
| Glycerophospholipid metabolism              | 36    | 0.334    | 2    | 0.04207  | 1.376   | 1           | 0.85675 | 0.14147 |
| Linoleic acid metabolism                    | 5     | 0.046388 | 1    | 0.045595 | 1.3411  | 1           | 0.85675 | 0       |
| Valine, leucine and isoleucine degradation  | 40    | 0.37111  | 2    | 0.050997 | 1.2925  | 1           | 0.85675 | 0       |
| alpha-Linolenic acid metabolism             | 13    | 0.12061  | 1    | 0.11455  | 0.941   | 1           | 1       | 0       |
| Retinol metabolism                          | 16    | 0.14844  | 1    | 0.13919  | 0.85638 | 1           | 1       | 0.22754 |
| Pantothenate and CoA biosynthesis           | 19    | 0.17628  | 1    | 0.1632   | 0.78728 | 1           | 1       | 0       |
| Arachidonic acid metabolism                 | 36    | 0.334    | 1    | 0.28789  | 0.54077 | 1           | 1       | 0       |
| Tryptophan metabolism                       | 41    | 0.38038  | 1    | 0.32114  | 0.4933  | 1           | 1       | 0.14305 |
| Purine metabolism                           | 66    | 0.61233  | 1    | 0.46682  | 0.33085 | 1           | 1       | 0.00702 |



**Table S8.** Down- regulated metabolic pathways (CFA+saline VS saline)

| Pathway                                     | Total | Expected | Hits | Raw p    | #NAME?  | Holm adjust | FDR | Impact  |
|---------------------------------------------|-------|----------|------|----------|---------|-------------|-----|---------|
| Glycerolipid metabolism                     | 16    | 0.074221 | 1    | 0.072041 | 1.1424  | 1           | 1   | 0.01246 |
| Phosphatidylinositol signaling system       | 28    | 0.12989  | 1    | 0.12311  | 0.90971 | 1           | 1   | 0.00152 |
| Alanine, aspartate and glutamate metabolism | 28    | 0.12989  | 1    | 0.12311  | 0.90971 | 1           | 1   | 0.04808 |
| Biosynthesis of unsaturated fatty acids     | 36    | 0.167    | 1    | 0.1558   | 0.80744 | 1           | 1   | 0.09091 |
| Glycerophospholipid metabolism              | 36    | 0.167    | 1    | 0.1558   | 0.80744 | 1           | 1   | 0.13987 |

**Table S9.** Up- regulated metabolic pathways (CFA + 4 mg/kg LAH VS CFA+saline)

| Pathway                                     | Total | Expected | Hits | Raw p    | #NAME?  | Holm adjust | FDR     | Impact  |
|---------------------------------------------|-------|----------|------|----------|---------|-------------|---------|---------|
| Pantothenate and CoA biosynthesis           | 19    | 0.16368  | 2    | 0.010791 | 1.9669  | 0.90642     | 0.90642 | 0       |
| Valine, leucine and isoleucine biosynthesis | 8     | 0.06892  | 1    | 0.067028 | 1.1737  | 1           | 1       | 0       |
| alpha-Linolenic acid metabolism             | 13    | 0.11199  | 1    | 0.10679  | 0.97148 | 1           | 1       | 0.33333 |
| Fructose and mannose metabolism             | 18    | 0.15507  | 1    | 0.14498  | 0.83869 | 1           | 1       | 0       |
| Terpenoid backbone biosynthesis             | 18    | 0.15507  | 1    | 0.14498  | 0.83869 | 1           | 1       | 0.11429 |
| beta-Alanine metabolism                     | 21    | 0.18091  | 1    | 0.16716  | 0.77686 | 1           | 1       | 0       |
| Alanine, aspartate and glutamate metabolism | 28    | 0.24122  | 1    | 0.21688  | 0.66378 | 1           | 1       | 0.04808 |
| Biosynthesis of unsaturated fatty acids     | 36    | 0.31014  | 1    | 0.27033  | 0.5681  | 1           | 1       | 0       |
| Amino sugar and nucleotide sugar metabolism | 37    | 0.31875  | 1    | 0.27677  | 0.55787 | 1           | 1       | 0       |
| Pyrimidine metabolism                       | 39    | 0.33598  | 1    | 0.2895   | 0.53836 | 1           | 1       | 0.0743  |
| Valine, leucine and isoleucine degradation  | 40    | 0.3446   | 1    | 0.29578  | 0.52903 | 1           | 1       | 0       |
| Tryptophan metabolism                       | 41    | 0.35321  | 1    | 0.30201  | 0.51998 | 1           | 1       | 0.00202 |
| Fatty acid biosynthesis                     | 47    | 0.4049   | 1    | 0.33835  | 0.47064 | 1           | 1       | 0       |
| Aminoacyl-tRNA biosynthesis                 | 48    | 0.41352  | 1    | 0.34423  | 0.46315 | 1           | 1       | 0       |

**Table S10.** Down- regulated metabolic pathways (CFA + 4 mg/kg LAH VS CFA+saline)

| Pathway                              | Total | Expected | Hits | Raw p    | #NAME?  | Holm adjust | FDR | Impact  |
|--------------------------------------|-------|----------|------|----------|---------|-------------|-----|---------|
| Retinol metabolism                   | 16    | 0.095427 | 1    | 0.091712 | 1.0376  | 1           | 1   | 0.22754 |
| Porphyrin and chlorophyll metabolism | 30    | 0.17893  | 1    | 0.16574  | 0.78056 | 1           | 1   | 0.05288 |
| Arginine and proline metabolism      | 38    | 0.22664  | 1    | 0.20559  | 0.68699 | 1           | 1   | 0.0778  |
| Aminoacyl-tRNA biosynthesis          | 48    | 0.28628  | 1    | 0.25302  | 0.59684 | 1           | 1   | 0       |
| Steroid hormone biosynthesis         | 77    | 0.45924  | 1    | 0.37666  | 0.42405 | 1           | 1   | 0       |

**Table S11.** Up- regulated metabolic pathways (CFA + 8 mg/kg LAH VS CFA+saline)

| Pathway                                 | Total | Expected | Hits | Raw p    | #NAME?  | Holm adjust | FDR | Impact  |
|-----------------------------------------|-------|----------|------|----------|---------|-------------|-----|---------|
| alpha-Linolenic acid metabolism         | 13    | 0.043075 | 1    | 0.042394 | 1.3727  | 1           | 1   | 0.33333 |
| Terpenoid backbone biosynthesis         | 18    | 0.059642 | 1    | 0.058312 | 1.2342  | 1           | 1   | 0.11429 |
| Biosynthesis of unsaturated fatty acids | 36    | 0.11928  | 1    | 0.11387  | 0.94359 | 1           | 1   | 0       |

**Table S12.** Down- regulated metabolic pathways (CFA + 8 mg/kg LAH VS CFA+saline)

| Pathway                      | Total | Expected | Hits | Raw p    | #NAME?  | Holm adjust | FDR | Impact  |
|------------------------------|-------|----------|------|----------|---------|-------------|-----|---------|
| Vitamin B6 metabolism        | 9     | 0.059642 | 1    | 0.058236 | 1.2348  | 1           | 1   | 0       |
| Retinol metabolism           | 16    | 0.10603  | 1    | 0.1014   | 0.99396 | 1           | 1   | 0.22754 |
| Citrate cycle (TCA cycle)    | 20    | 0.13254  | 1    | 0.12526  | 0.90219 | 1           | 1   | 0       |
| Pyruvate metabolism          | 22    | 0.14579  | 1    | 0.13697  | 0.86337 | 1           | 1   | 0       |
| Glycolysis / Gluconeogenesis | 26    | 0.1723   | 1    | 0.15998  | 0.79594 | 1           | 1   | 0.1055  |
